# Supplementary material
Source: HighWire-hosted journal article supplement (https://bmjopen.bmj.com/content/9/8/e030285)
Supplement: inline-supplementary-material-1 [file inline-supplementary-material-1.pdf]

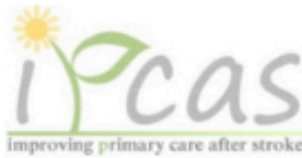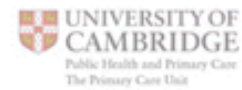

University Hospitals of Leicester NHS Trust

## Improving Primary Care After Stroke TRIAL CONSENT FORM - STROKE SURVIVOR

Version 2.0

Participant ID: <Participant ID>

Please **initial**  
each box

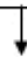

- |                                                                                                                                                                          |                                                         |
|--------------------------------------------------------------------------------------------------------------------------------------------------------------------------|---------------------------------------------------------|
| 1. I have read and understood the information sheet ( <i>version, dated</i> ) for the above study, and have had the opportunity to ask questions.                        | <input style="width: 80px; height: 30px;" type="text"/> |
| 2. I understand that I can stop taking part in the research at any time. If I stop I do not have to give a reason. My medical care or legal rights will not be affected. | <input style="width: 80px; height: 30px;" type="text"/> |
| 3. I understand that my GP will be informed of my participation in this study.                                                                                           | <input style="width: 80px; height: 30px;" type="text"/> |
| 4. I understand that the researchers may want to look at relevant sections of my medical notes. I give permission for researchers to have access to my medical records.  | <input style="width: 80px; height: 30px;" type="text"/> |
| 5. I understand that my <b>confidential data</b> (e.g. my name and address) will be stored securely, and only accessed by the research team.                             | <input style="width: 80px; height: 30px;" type="text"/> |
| 6. I understand that my <b>anonymised</b> data will be archived and may be shared with other researchers and used in future studies.                                     | <input style="width: 80px; height: 30px;" type="text"/> |
| 7. <b>I agree to take part in this study.</b>                                                                                                                            | <input style="width: 80px; height: 30px;" type="text"/> |

The following statement is **optional**. Please **only initial the box** if you **agree** to the statement.

- |                                                   |                                                         |
|---------------------------------------------------|---------------------------------------------------------|
| 8. I agree for my annual review to be audiotaped. | <input style="width: 80px; height: 30px;" type="text"/> |
|---------------------------------------------------|---------------------------------------------------------|

**Name of Participant:** \_\_\_\_\_

**Date:** \_\_\_\_\_

**Signature:** \_\_\_\_\_
